# Supplementary material for: Veterinarian Nominated Common Conditions of Rabbits and Guinea Pigs Compared with Published Literature
Source: PubMed Central journal article supplement (PMC5753638; doi:10.3390/vetsci4040058), 2017-11-22

Article

# Veterinarian Nominated Common Conditions of Rabbits and Guinea Pigs Compared with Published Literature

Natalie J. Robinson <sup>1,\*</sup>, Emma Grimes <sup>1</sup>, Douglas Grindlay <sup>2</sup> and Marnie L. Brennan <sup>1</sup>

<sup>1</sup> Centre for Evidence-Based Veterinary Medicine, School of Veterinary Medicine and Science, The University of Nottingham, Sutton Bonington Campus, Loughborough LE12 5RD, UK; svyeg2@nottingham.ac.uk (E.G.); marnie.brennan@nottingham.ac.uk (M.L.B.)

<sup>2</sup> Centre for Evidence-based Dermatology, The University of Nottingham, Kings Meadow Campus, Nottingham NG7 2NR, UK; douglas.grindlay@nottingham.ac.uk

\* Correspondence: natalie.robinson@nottingham.ac.uk; Tel.: +44-115-951-6782

## Supplementary Materials:

Body system definitions used to classify conditions or complaints nominated by veterinarians from a UK based survey.

Any disease, injury or set of clinical signs primarily affecting:

**Skin:** the integumentary system including the external ear canal

**Musculoskeletal:** the skeleton or skeletal muscles

**Neurological:** the central or peripheral nerves including conditions of the brain/spinal cord

**Ophthalmology:** the eyes, eyelids (including third eyelid), tear ducts and other associated structures

**Urinary/renal:** the upper or lower urinary tract including kidneys, ureters, bladder and urethra

**Reproductive:** the male or female reproductive tract, including prostate, testes, penis, uterus, ovaries, vagina, vulva and mammary glands, and encompassing problems of pregnancy, parturition and lactation

**Gastrointestinal:** the gastrointestinal tract, liver, gall bladder and exocrine pancreas

**Cardiovascular:** the cardiovascular system, including the heart, pericardium and blood vessels

**Respiratory:** the respiratory system including lungs, trachea and nasal passages

**Endocrine:** the endocrinological system including disorders of the pituitary, thyroid, adrenal or endocrine pancreas which results in a hormone imbalance

**Dental:** the teeth, gums or related structures

OR

**Non-specific:** Any disease, injury or set of clinical signs which cannot be fitted into one of the above categories. This includes systemic diseases which affect multiple body systems, and non-specific clinical signs such as inappetance or pyrexia of unknown origin

**Behavioural:** Any activity judged to be outside the normal behaviour pattern for animals of that age, where no underlying medical or physiological abnormality can be found

**Preventive medicine:** Any activity associated with the prevention of a particular disease, injury or clinical sign. Includes vaccination, prevention of parasites, prophylactic neutering, prevention of season, prevention of pregnancy, microchipping and nail clipping (provided this is not done to treat a current nail or pad disorder)

## Type of citation

**Primary research citation:** A citation reporting a research study (of one of the types described by CEVM) in the form of a scientific paper or scientific conference presentation, or reports the synthesis of evidence with clearly defined methods e.g., a systematic review

**Expert opinion citation:** A citation which does not report a research study or evidence synthesis with clearly defined methods e.g., an editorial, a narrative review, a non-research conference presentation etc.

### Environment

The environment/population of animals from which data were gathered or the primary audience for which the article was intended, as defined in the abstract or title of the paper:

**Laboratory:** Data collected from laboratory rabbits or guinea pigs/in a laboratory environment or primarily aimed at those working with laboratory rabbits or guinea pigs

**Pet:** Data collected from pets, rabbits or guinea pigs or primarily aimed at those working with pet rabbits or guinea pigs, usually in a veterinary practice setting. Pet in this context is defined as a domestic animal kept for companionship or pleasure.

**Wild:** Data collected from or primarily aimed at those working with wild, non-domesticated rabbits or guinea pigs

**Farm:** Data collected from or primarily aimed at those working with farmed rabbits or guinea pigs. Farmed in this context refers to being bred and raised as a production animal.

**Not specified:** Any article where the environment from which data were collected, or audience at which the article is primarily aimed, is unclear.

**Table S1.** Information quantity rating for amount of information available on rabbit conditions by body system, as provided by veterinarians in a questionnaire on common conditions.

|                     | Information Quantity Rating |      |          |      |          |      |          |      |            |      | Total |
|---------------------|-----------------------------|------|----------|------|----------|------|----------|------|------------|------|-------|
|                     | None                        |      | A little |      | Some     |      | A lot    |      | Don't know |      |       |
|                     | <i>n</i>                    | %    | <i>n</i> | %    | <i>n</i> | %    | <i>n</i> | %    | <i>n</i>   | %    |       |
| Dental              | 12                          | 0.6  | 327      | 17.2 | 912      | 48   | 611      | 32.1 | 39         | 2.1  | 1901  |
| Skin                | 55                          | 3.4  | 601      | 37.6 | 672      | 42   | 194      | 12.1 | 77         | 4.8  | 1599  |
| Gastrointestinal    | 19                          | 2    | 310      | 32.3 | 452      | 47.1 | 140      | 14.6 | 38         | 4    | 959   |
| Non-specific        | 29                          | 3.5  | 281      | 34.1 | 367      | 44.6 | 113      | 13.7 | 33         | 4    | 823   |
| Ophthalmology       | 7                           | 2.1  | 132      | 39.4 | 144      | 43   | 35       | 10.4 | 17         | 5.1  | 335   |
| Respiratory         | 4                           | 1.3  | 99       | 31   | 158      | 49.5 | 45       | 14.1 | 13         | 4.1  | 319   |
| Neurological        | 3                           | 1.4  | 81       | 38.2 | 99       | 46.7 | 24       | 11.3 | 5          | 2.4  | 212   |
| Urinary             | 6                           | 6.2  | 47       | 48.5 | 31       | 32   | 7        | 7.2  | 6          | 6.2  | 97    |
| Musculoskeletal     | 6                           | 16.7 | 18       | 50   | 9        | 25   | 2        | 5.6  | 1          | 2.8  | 36    |
| Reproduction        | 0                           | 0    | 11       | 50   | 5        | 22.7 | 5        | 22.7 | 1          | 4.5  | 22    |
| Behaviour           | 0                           | 0    | 6        | 54.5 | 3        | 27.3 | 0        | 0    | 2          | 18.2 | 11    |
| Preventive medicine | 1                           | 12.5 | 3        | 37.5 | 3        | 37.5 | 0        | 0    | 1          | 12.5 | 8     |
| Renal               | 0                           | 0    | 1        | 50   | 0        | 0    | 0        | 0    | 1          | 50   | 2     |
| Endocrine           | 0                           | 0    | 0        | 0    | 0        | 0    | 0        | 0    | 0          | 0    | 0     |
| Cardiology          | 0                           | 0    | 0        | 0    | 0        | 0    | 0        | 0    | 0          | 0    | 0     |

**Table S2.** Information quantity rating for amount of information available on guinea pig conditions by body system, as provided by veterinarians in a questionnaire on common conditions.

| Body System      | Information Quantity Rating |      |          |      |          |      |          |     |            |      | Total <i>n</i> |
|------------------|-----------------------------|------|----------|------|----------|------|----------|-----|------------|------|----------------|
|                  | None                        |      | A little |      | Some     |      | A lot    |     | Don't know |      |                |
|                  | <i>n</i>                    | %    | <i>n</i> | %    | <i>n</i> | %    | <i>n</i> | %   | <i>n</i>   | %    |                |
| Skin             | 42                          | 5.8  | 356      | 49.0 | 237      | 32.6 | 48       | 6.6 | 43         | 5.9  | 726            |
| Non-specific     | 48                          | 13.6 | 196      | 55.4 | 70       | 19.8 | 6        | 1.7 | 34         | 9.6  | 354            |
| Dental           | 17                          | 5.1  | 179      | 53.3 | 101      | 30.1 | 24       | 7.1 | 15         | 4.5  | 336            |
| Urinary          | 14                          | 10.6 | 76       | 57.6 | 27       | 20.5 | 4        | 3.0 | 11         | 8.3  | 132            |
| Gastrointestinal | 13                          | 10.9 | 59       | 49.6 | 32       | 26.9 | 4        | 3.4 | 11         | 9.2  | 119            |
| Respiratory      | 14                          | 12.5 | 62       | 55.4 | 24       | 21.4 | 3        | 2.7 | 9          | 8.0  | 112            |
| Ophthalmology    | 12                          | 16.4 | 31       | 42.5 | 17       | 23.3 | 1        | 1.4 | 12         | 16.4 | 73             |
| Reproduction     | 3                           | 6.0  | 35       | 70.0 | 7        | 14.0 | 3        | 6.0 | 2          | 4.0  | 50             |
| Musculoskeletal  | 2                           | 40.0 | 1        | 20.0 | 1        | 20.0 | 0        | 0.0 | 1          | 20.0 | 5              |

|                     |   |      |   |       |   |      |   |      |   |      |   |
|---------------------|---|------|---|-------|---|------|---|------|---|------|---|
| Preventive medicine | 1 | 20.0 | 3 | 60.0  | 0 | 0.0  | 1 | 20.0 | 0 | 0.0  | 5 |
| Endocrine           | 1 | 25.0 | 2 | 50.0  | 1 | 25.0 | 0 | 0.0  | 0 | 0.0  | 4 |
| Neurological        | 1 | 33.3 | 2 | 66.7  | 0 | 0.0  | 0 | 0.0  | 0 | 0.0  | 3 |
| Renal               | 0 | 0.0  | 2 | 66.7  | 0 | 0.0  | 0 | 0.0  | 1 | 33.3 | 3 |
| Behaviour           | 0 | 0.0  | 2 | 100.0 | 0 | 0.0  | 0 | 0.0  | 0 | 0.0  | 2 |
| Cardiology          | 0 | 0.0  | 1 | 100.0 | 0 | 0.0  | 0 | 0.0  | 0 | 0.0  | 1 |

**Table S3.** List of publications containing rabbit citations (only journals containing 3 or more rabbit citations are shown).

|    | Journal Title                                                                                    | Number of Citations |
|----|--------------------------------------------------------------------------------------------------|---------------------|
| 1  | Laboratory Animal Science                                                                        | 18                  |
| 2  | Exotic DVM                                                                                       | 14                  |
| 3  | Laboratory Animals                                                                               | 11                  |
| 4  | American Journal of Tropical Medicine and Hygiene                                                | 10                  |
| 5  | Indian Veterinary Journal                                                                        | 10                  |
| 6  | Veterinary Record                                                                                | 10                  |
| 7  | World Rabbit Science                                                                             | 10                  |
| 8  | Veterinary Times                                                                                 | 9                   |
| 9  | Veterinary Parasitology                                                                          | 8                   |
| 10 | Research in Veterinary Science                                                                   | 7                   |
| 11 | Antimicrobial Agents and Chemotherapy                                                            | 6                   |
| 12 | Journal of Applied Rabbit Research                                                               | 6                   |
| 13 | Vaccine                                                                                          | 6                   |
| 14 | Veterinary Pathology                                                                             | 6                   |
| 15 | VN Times                                                                                         | 6                   |
| 16 | Dissertation Abstracts International, B                                                          | 5                   |
| 17 | Journal of Veterinary Medicine                                                                   | 5                   |
| 18 | Veterinary Ophthalmology                                                                         | 5                   |
| 19 | Bulletin of the Veterinary Institute in Pulawy                                                   | 4                   |
| 20 | Indian Journal of Veterinary Pathology                                                           | 4                   |
| 21 | Infection and immunity                                                                           | 4                   |
| 22 | Irish Veterinary Journal                                                                         | 4                   |
| 23 | Journal of Exotic Pet Medicine                                                                   | 4                   |
| 24 | Journal of Parasitology                                                                          | 4                   |
| 25 | Seminars in Avian and Exotic Pet Medicine                                                        | 4                   |
| 26 | Veterinary Immunology and Immunopathology                                                        | 4                   |
| 27 | Acta Tropica                                                                                     | 3                   |
| 28 | Asian Pacific Journal of Tropical Medicine                                                       | 3                   |
| 29 | Australian Journal of Zoology                                                                    | 3                   |
| 30 | British Veterinary Journal                                                                       | 3                   |
| 31 | Contemporary Topics in Laboratory Animal Science                                                 | 3                   |
| 32 | In Practice                                                                                      | 3                   |
| 33 | Indian Journal of Animal Health                                                                  | 3                   |
| 34 | Indian Journal of Animal Sciences                                                                | 3                   |
| 35 | Journal of Comparative Pathology                                                                 | 3                   |
| 36 | Journal of Veterinary Diagnostic Investigation                                                   | 3                   |
| 37 | Journal of Veterinary Medical Science                                                            | 3                   |
| 38 | Journal of Veterinary Parasitology                                                               | 3                   |
| 39 | Journal of Virology                                                                              | 3                   |
| 40 | Journal of Wildlife Diseases                                                                     | 3                   |
| 41 | Korean Journal of Veterinary Research                                                            | 3                   |
| 42 | Lucrari Stiintifice—Universitatea de Stiinte Agricole a Banatului Timisoara, Medicina Veterinara | 3                   |
| 43 | Theriogenology                                                                                   | 3                   |
| 44 | Trakia Journal of Sciences                                                                       | 3                   |
| 45 | Veterinary and Comparative Orthopaedics and Traumatology                                         | 3                   |

|    |                            |   |
|----|----------------------------|---|
| 46 | Veterinary Journal         | 3 |
| 47 | Veterinary Medicine        | 3 |
| 48 | Veterinary Nursing Journal | 3 |

**Table S4.** List of publications containing guinea pig citations (only journals containing 3 or more guinea pig citations are shown).

|    | Journal                                                            | Number of Citations |
|----|--------------------------------------------------------------------|---------------------|
| 1  | Veterinary Clinics of North America: Exotic Animal Practice        | 23                  |
| 2  | Antimicrobial Agents and Chemotherapy                              | 16                  |
| 3  | Exotic DVM                                                         | 14                  |
| 4  | Laboratory Animal Science                                          | 13                  |
| 5  | Veterinary Times                                                   | 13                  |
| 6  | Vaccine                                                            | 10                  |
| 7  | Canadian Veterinary Journal                                        | 9                   |
| 8  | Laboratory Animals                                                 | 9                   |
| 9  | Veterinary Ophthalmology                                           | 9                   |
| 10 | Veterinary Record                                                  | 9                   |
| 11 | Journal of the American Veterinary Medical Association             | 8                   |
| 12 | American Journal of Veterinary Research                            | 6                   |
| 13 | In Practice                                                        | 6                   |
| 14 | Journal of Exotic Pet Medicine                                     | 6                   |
| 15 | Journal of Infectious Diseases                                     | 6                   |
| 16 | Veterinary Dermatology                                             | 6                   |
| 17 | VN Times                                                           | 6                   |
| 18 | Journal of Ethnopharmacology                                       | 5                   |
| 19 | Journal of Small Animal Practice                                   | 5                   |
| 20 | UK Vet: Companion Animal                                           | 5                   |
| 21 | Infection and Immunity                                             | 4                   |
| 22 | Journal of Antimicrobial Chemotherapy                              | 4                   |
| 23 | Journal of Clinical Microbiology                                   | 4                   |
| 24 | Scandinavian Journal of Laboratory Animal Science                  | 4                   |
| 25 | Veterinary Microbiology                                            | 4                   |
| 26 | Animal Technology                                                  | 3                   |
| 27 | Annals of Tropical Medicine and Parasitology                       | 3                   |
| 28 | Australian Veterinary Journal                                      | 3                   |
| 29 | Biology of Reproduction                                            | 3                   |
| 30 | Clinical and Vaccine Immunology                                    | 3                   |
| 31 | Clinical Microbiology and Infection                                | 3                   |
| 32 | Compendium on Continuing Education for the Practicing Veterinarian | 3                   |
| 33 | Contemporary Topics in Laboratory Animal Science                   | 3                   |
| 34 | European Journal of Companion Animal Practice                      | 3                   |
| 35 | Indian Veterinary Journal                                          | 3                   |
| 36 | International Archives of Allergy and Immunology                   | 3                   |
| 37 | Journal of Endocrinology                                           | 3                   |
| 38 | Journal of the American Association for Laboratory Animal Science  | 3                   |
| 39 | Journal of Veterinary Medical Science                              | 3                   |
| 40 | Journal of Virological Methods                                     | 3                   |
| 41 | Medical Mycology                                                   | 3                   |
| 42 | Mycopathologia                                                     | 3                   |
| 43 | Revista do Instituto de Medicina Tropical de Sao Paulo             | 3                   |
| 44 | Veterinary Pathology                                               | 3                   |
| 45 | Veterinary Radiology & Ultrasound                                  | 3                   |

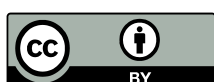

Supplement: vetsci-04-00058-s001.pdf [file vetsci-04-00058-s001.pdf]
